# Supplementary material for: The impact of COL1A1 and COL6A1 expression on hypospadias and penile curvature severity
Source: Research Square preprint supplement (doi:10.21203/rs.3.rs-35181/v5), 2020-11-24
Supplement: Supplementary file 1 [file 41e27c400989ce187dcfbebb.docx]

FIGURE

| **Gen** | **Control** | **Hypospadia Type** | | **Penile curvature** | | |  |
| --- | --- | --- | --- | --- | --- | --- | --- |
| **Distal Hypospadia** | **Proximal**  **Hypospadia** | **Mild** | **Moderate** | **Severe** |  |
| **GAPDH** |  | **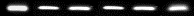** |  |  |  |  |  |
| **COL1A1** |  |  |  |  |  | **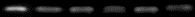** |  |
| **COL6A1** |  |  |  |  | **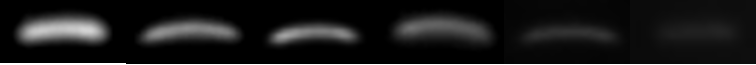** |  |  |

| **Gen** | **Control** | **Hypospadia Type** | | **Penile curvature** | | |  |
| --- | --- | --- | --- | --- | --- | --- | --- |
| **Distal Hypospadia** | **Proximal**  **Hypospadia** | **Mild** | **Moderate** | **Severe** |  |
| **GAPDH** |  |  |  |  | **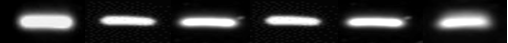** |  |  |
|  | 1 | 2 | 3 | 2 | 3 | 4 |  |
| **COL1A1** | **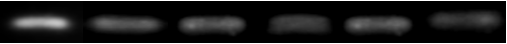** |  |  |  |  |  |  |
|  | 5 | 6 | 7 | 8 | 7 | 9 |  |
| **COL6A1** | **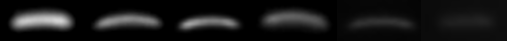** |  |  |  |  |  |  |
|  | 10 | 11 | 12 | 13 | 14 | 15 |  |

Figure 1. Full Length image of GADPH gels


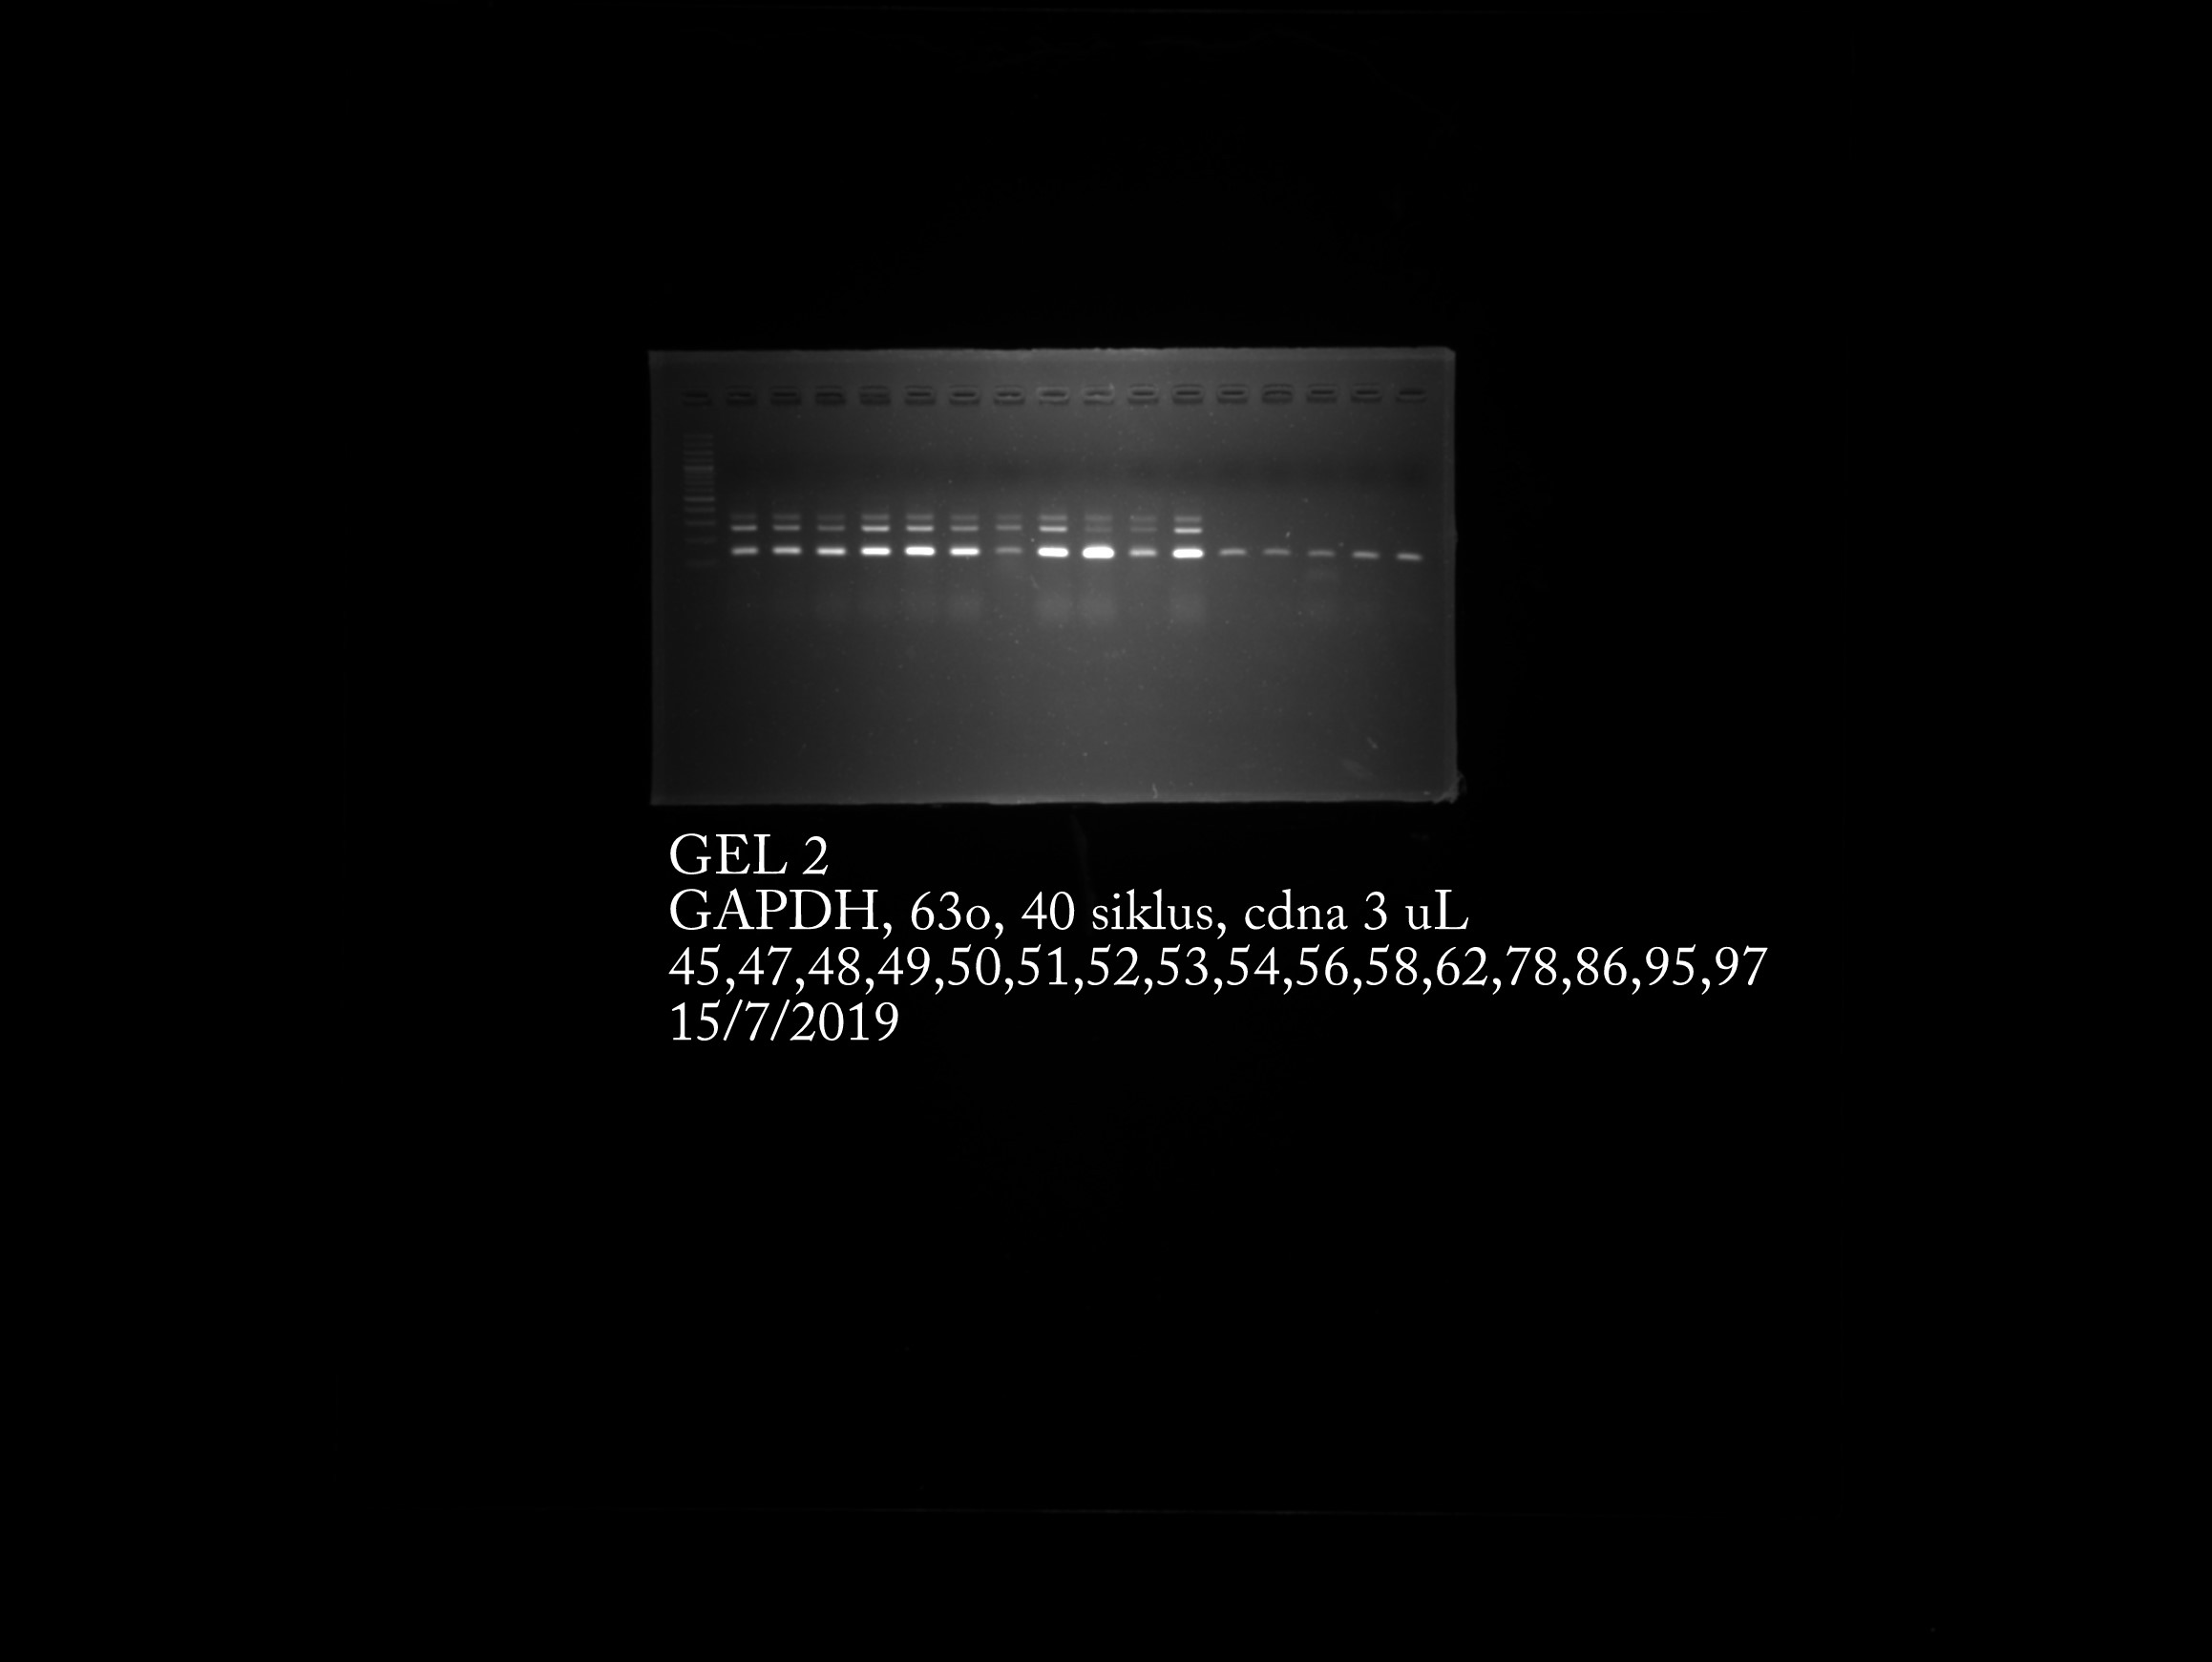


1


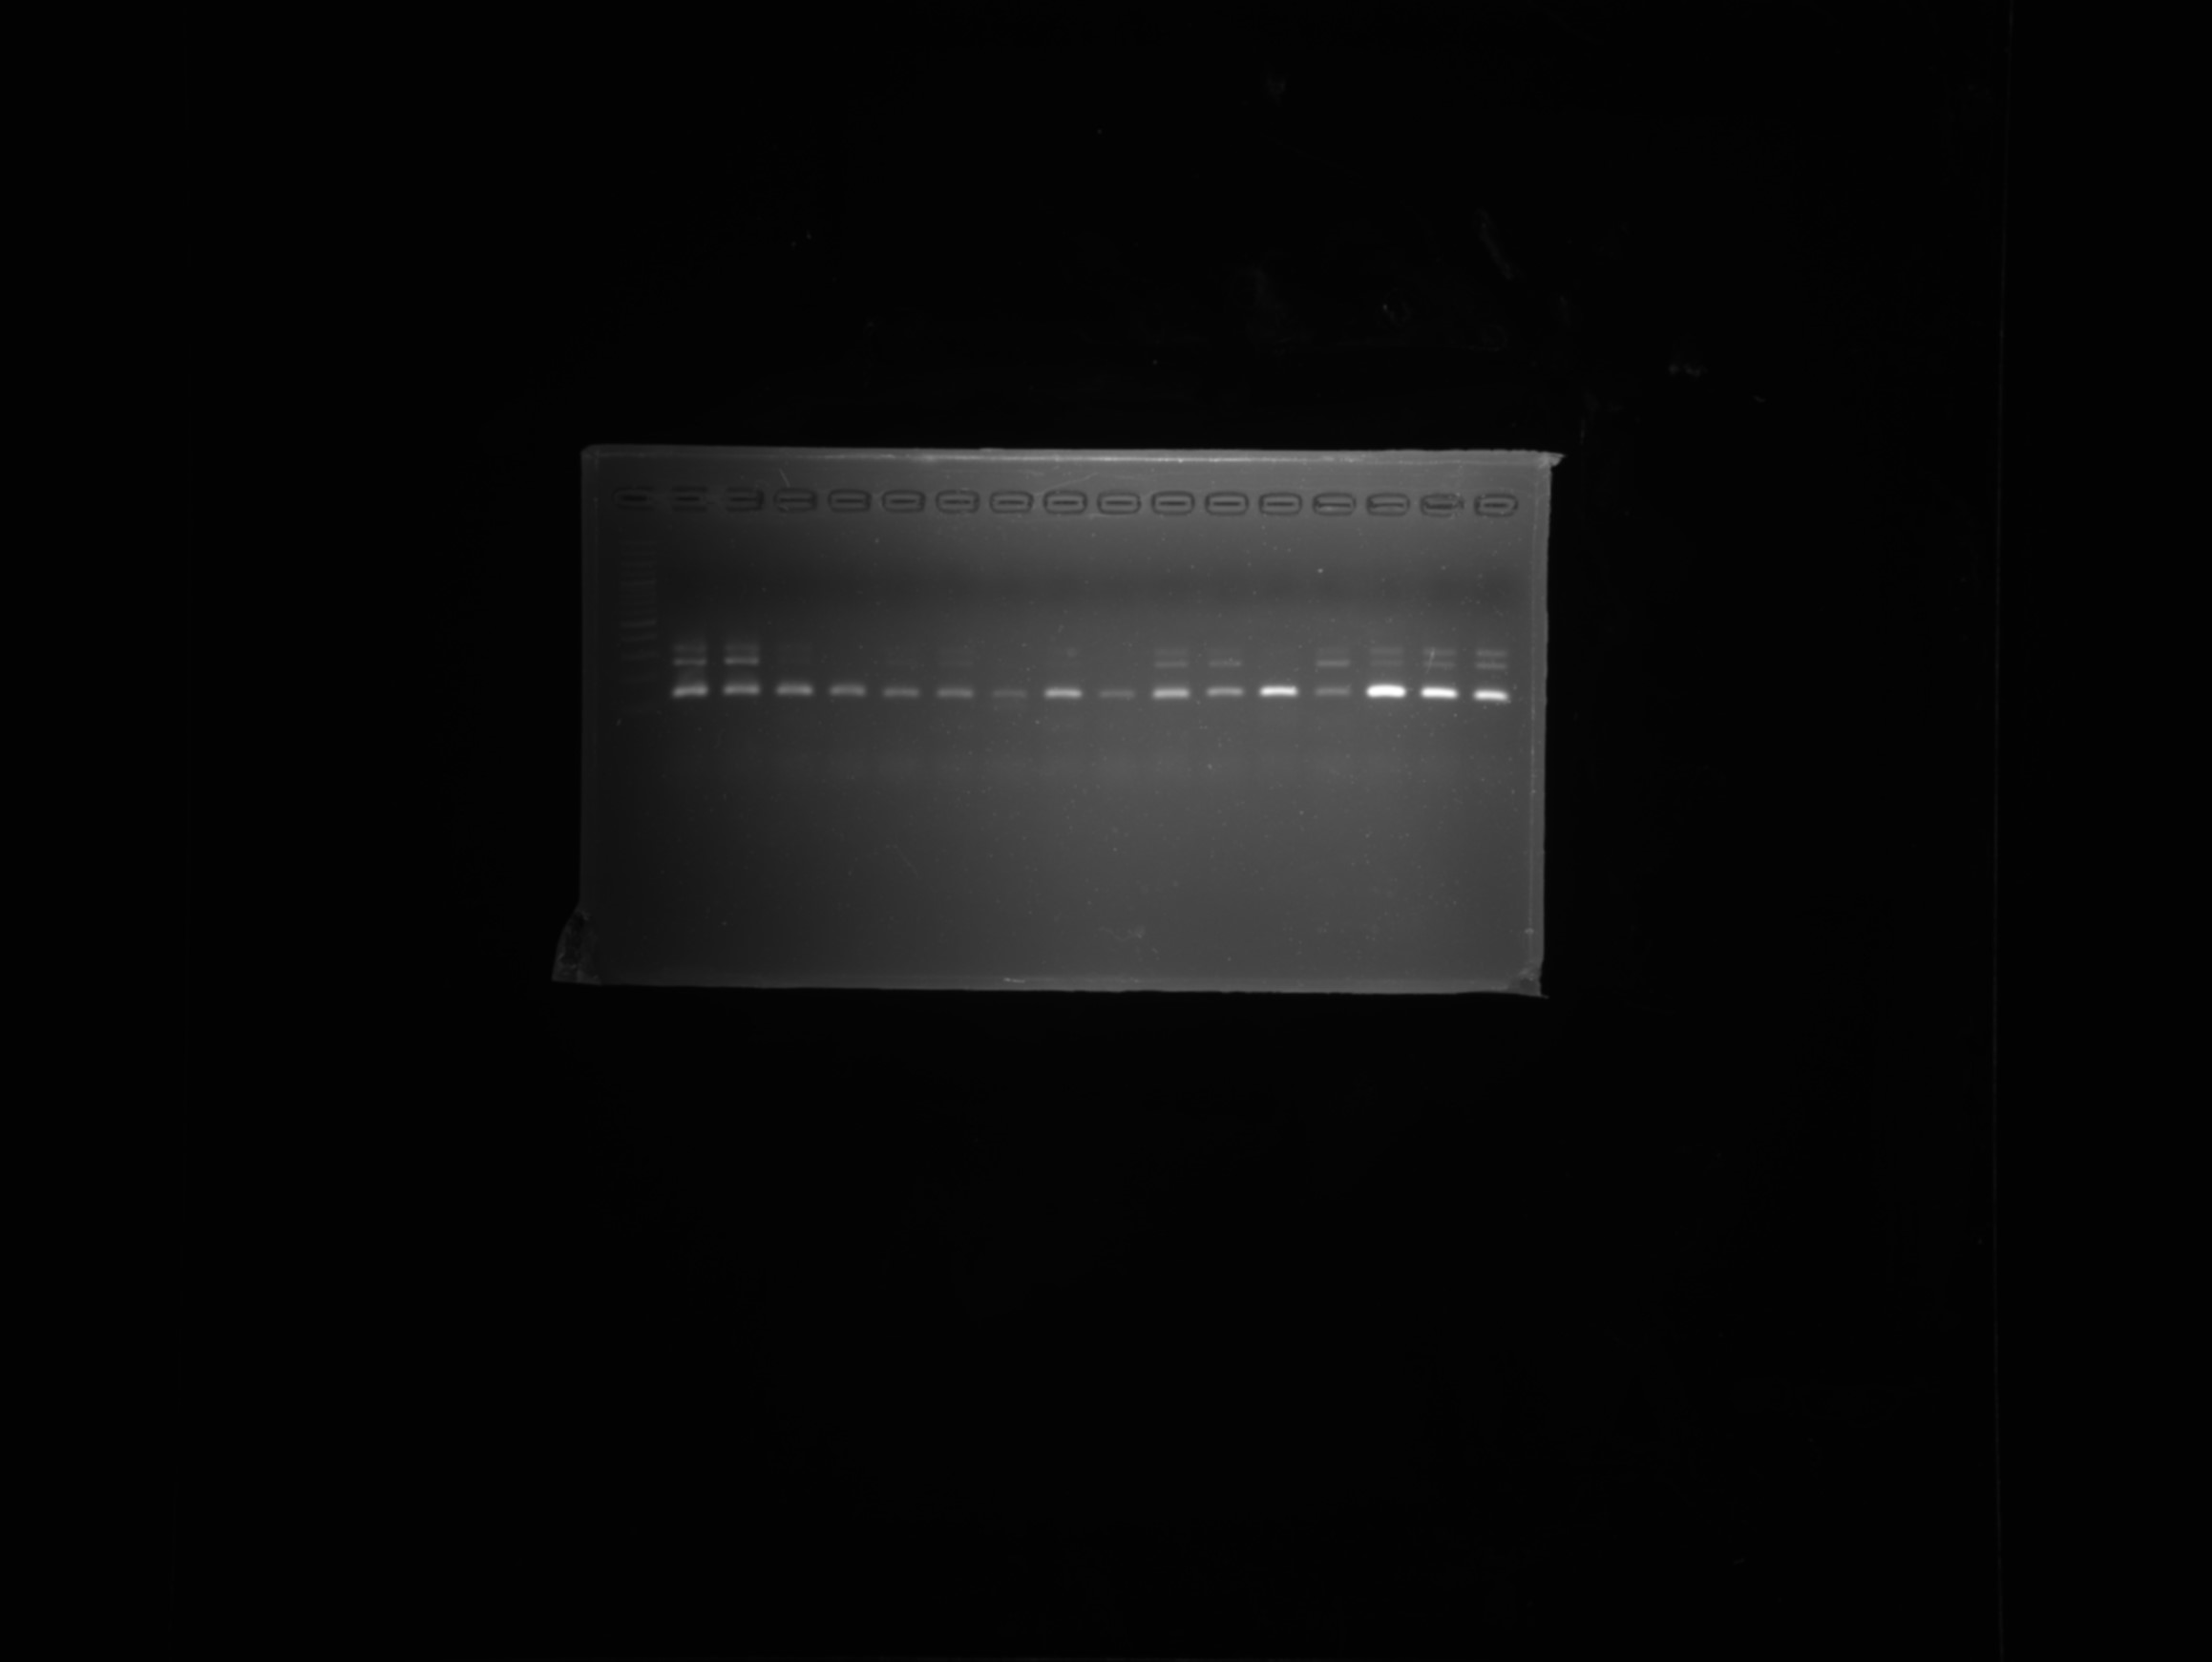


2


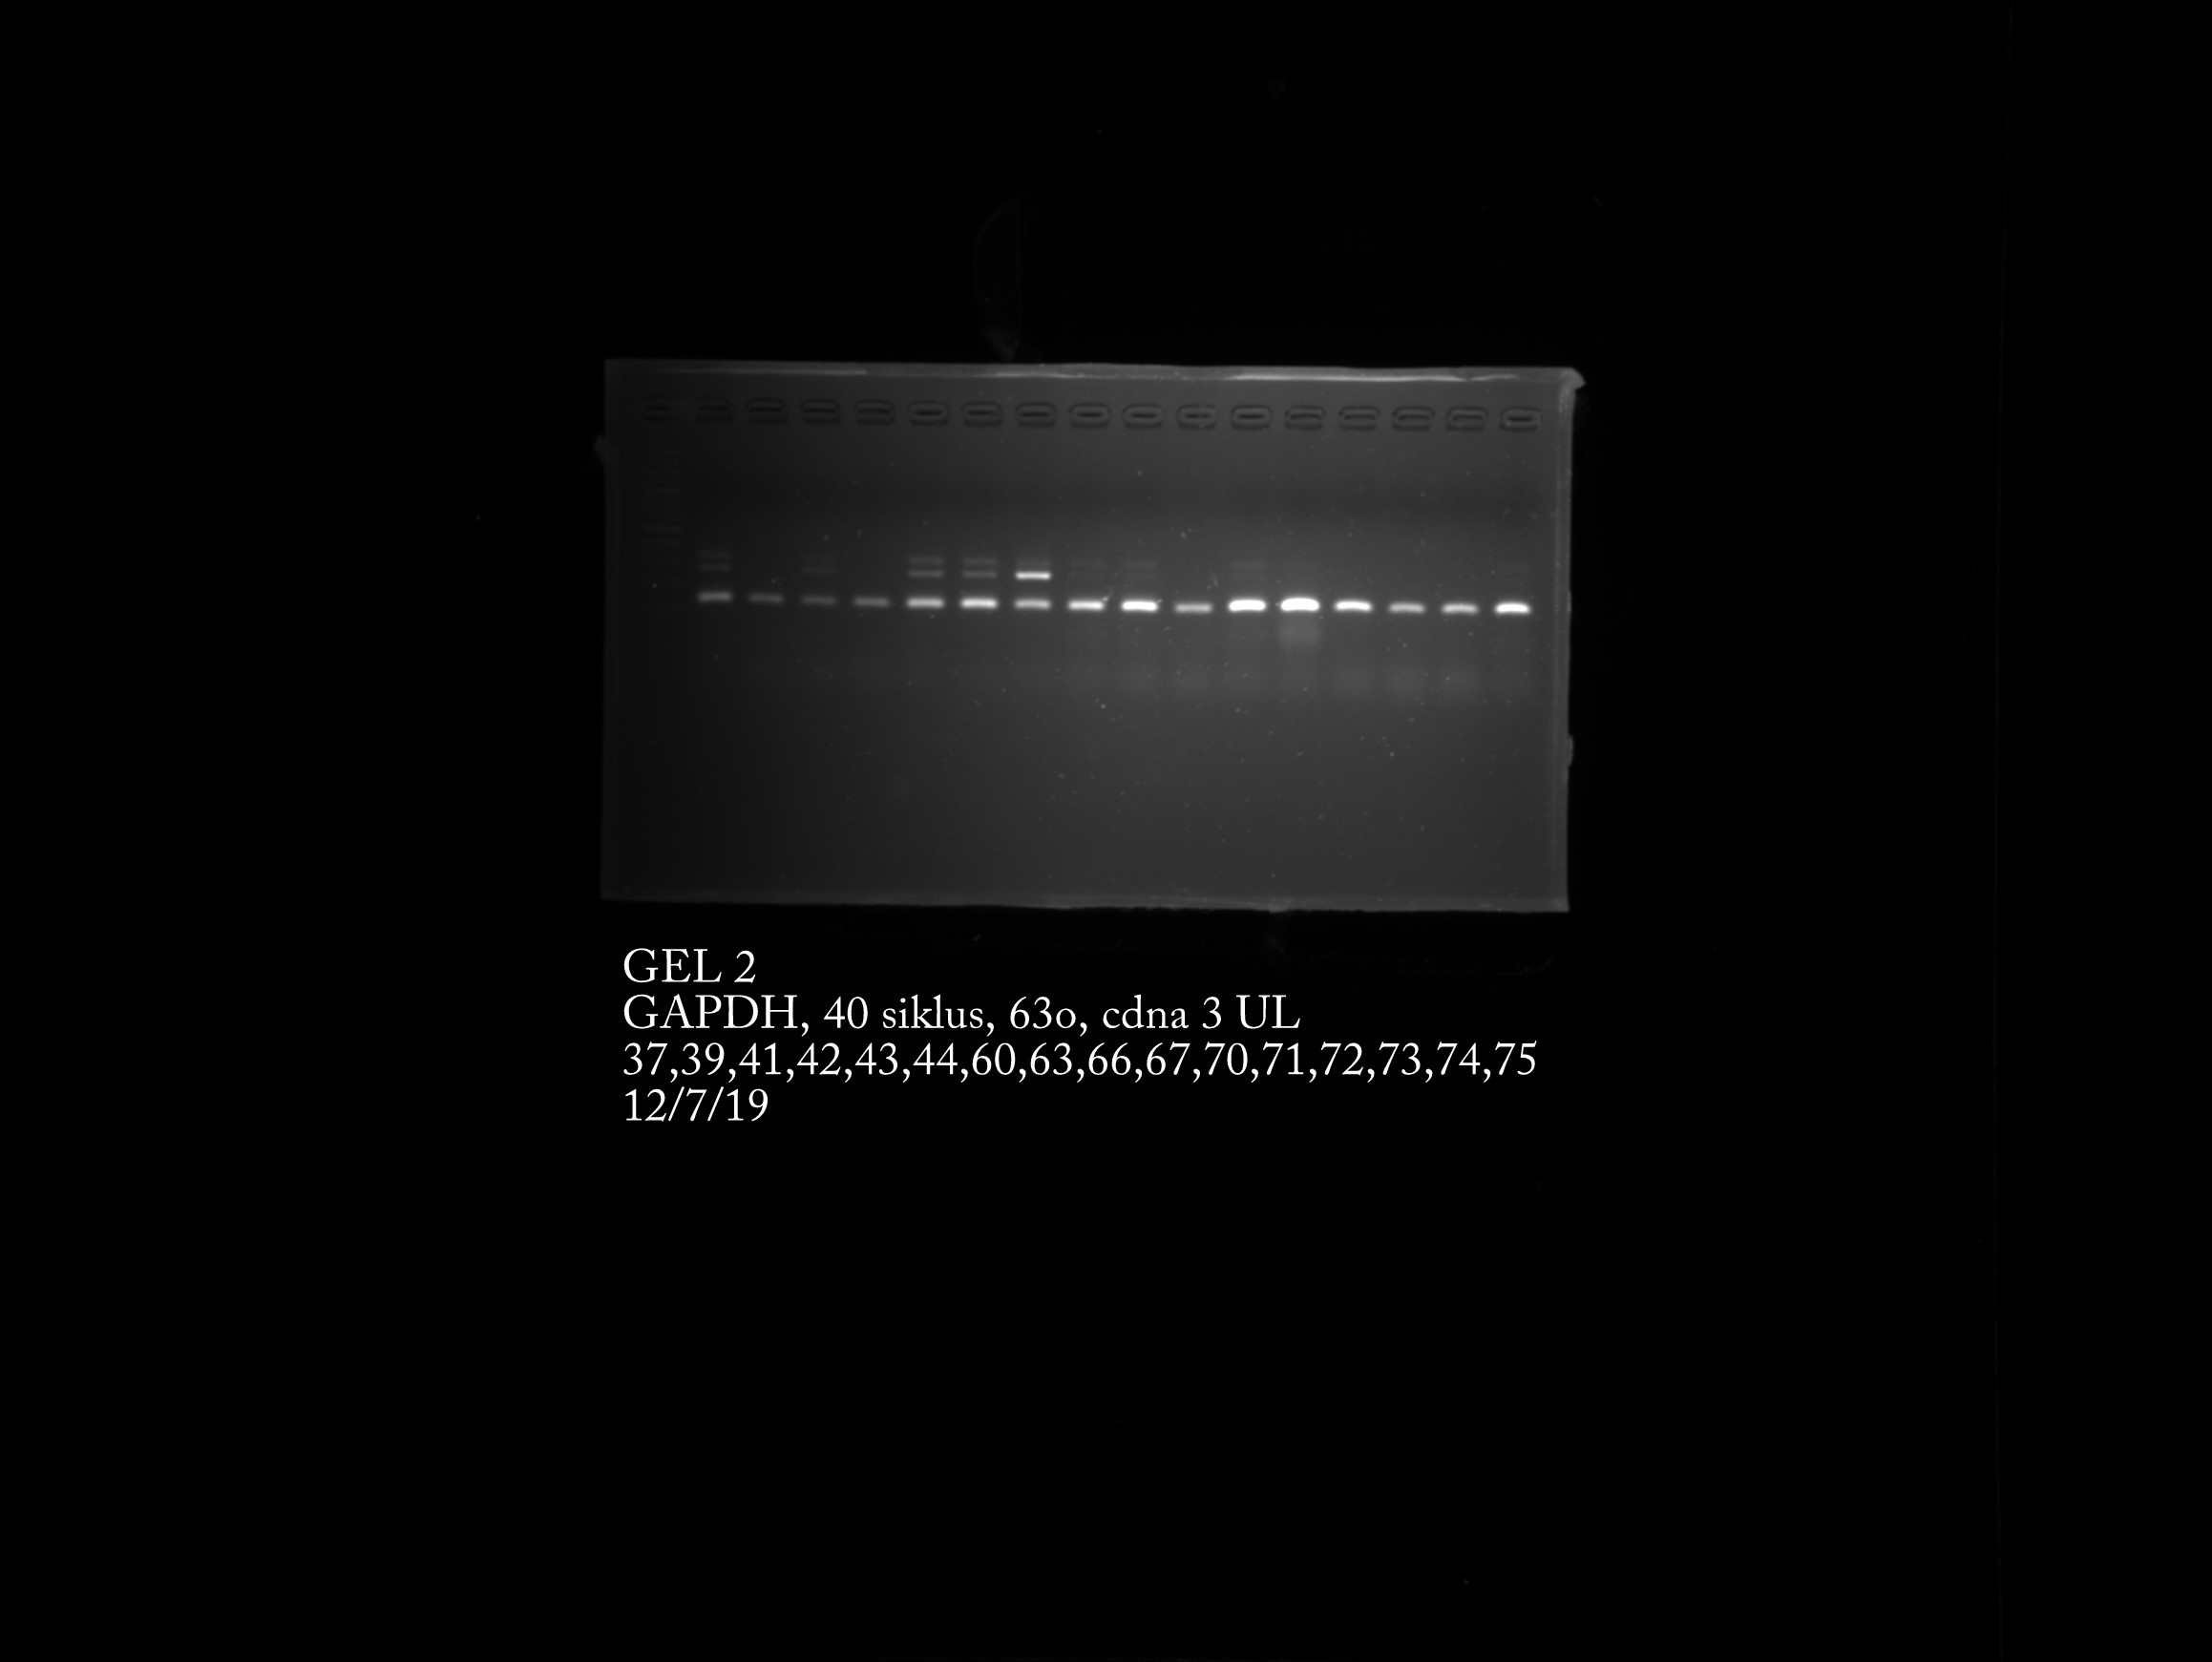


3


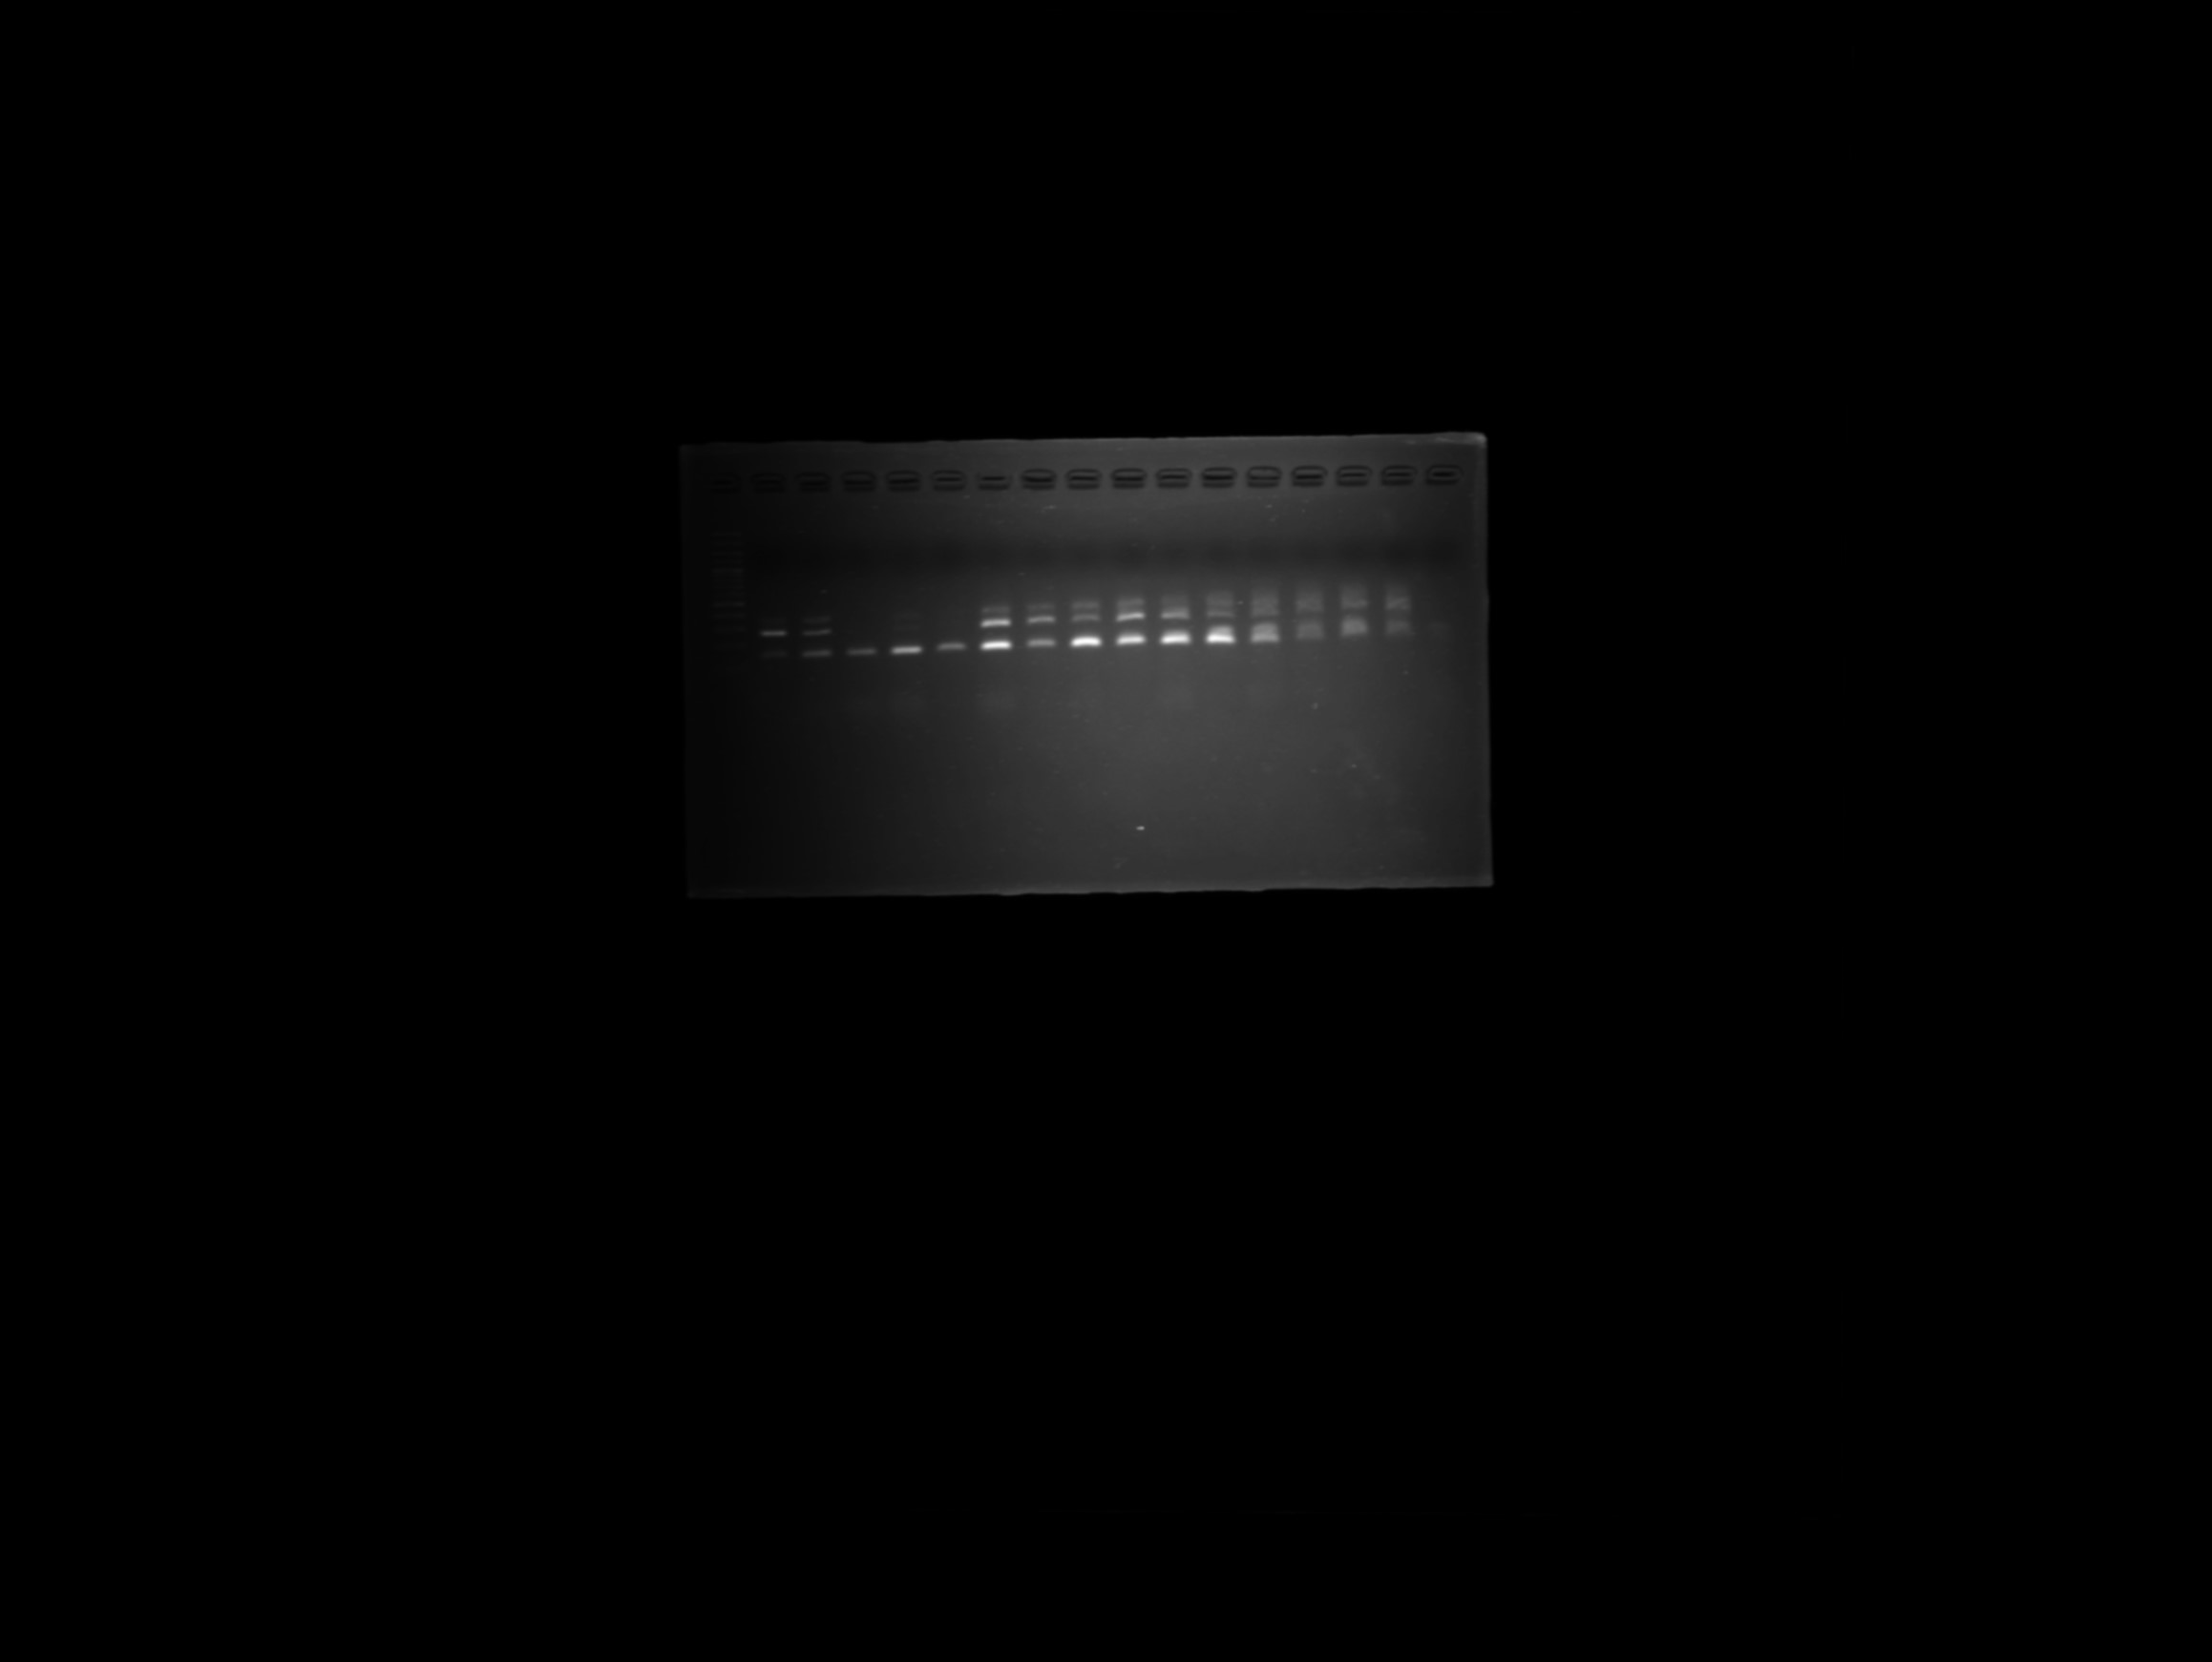


4

Figure 2. Full Length image of COL1A1 gels


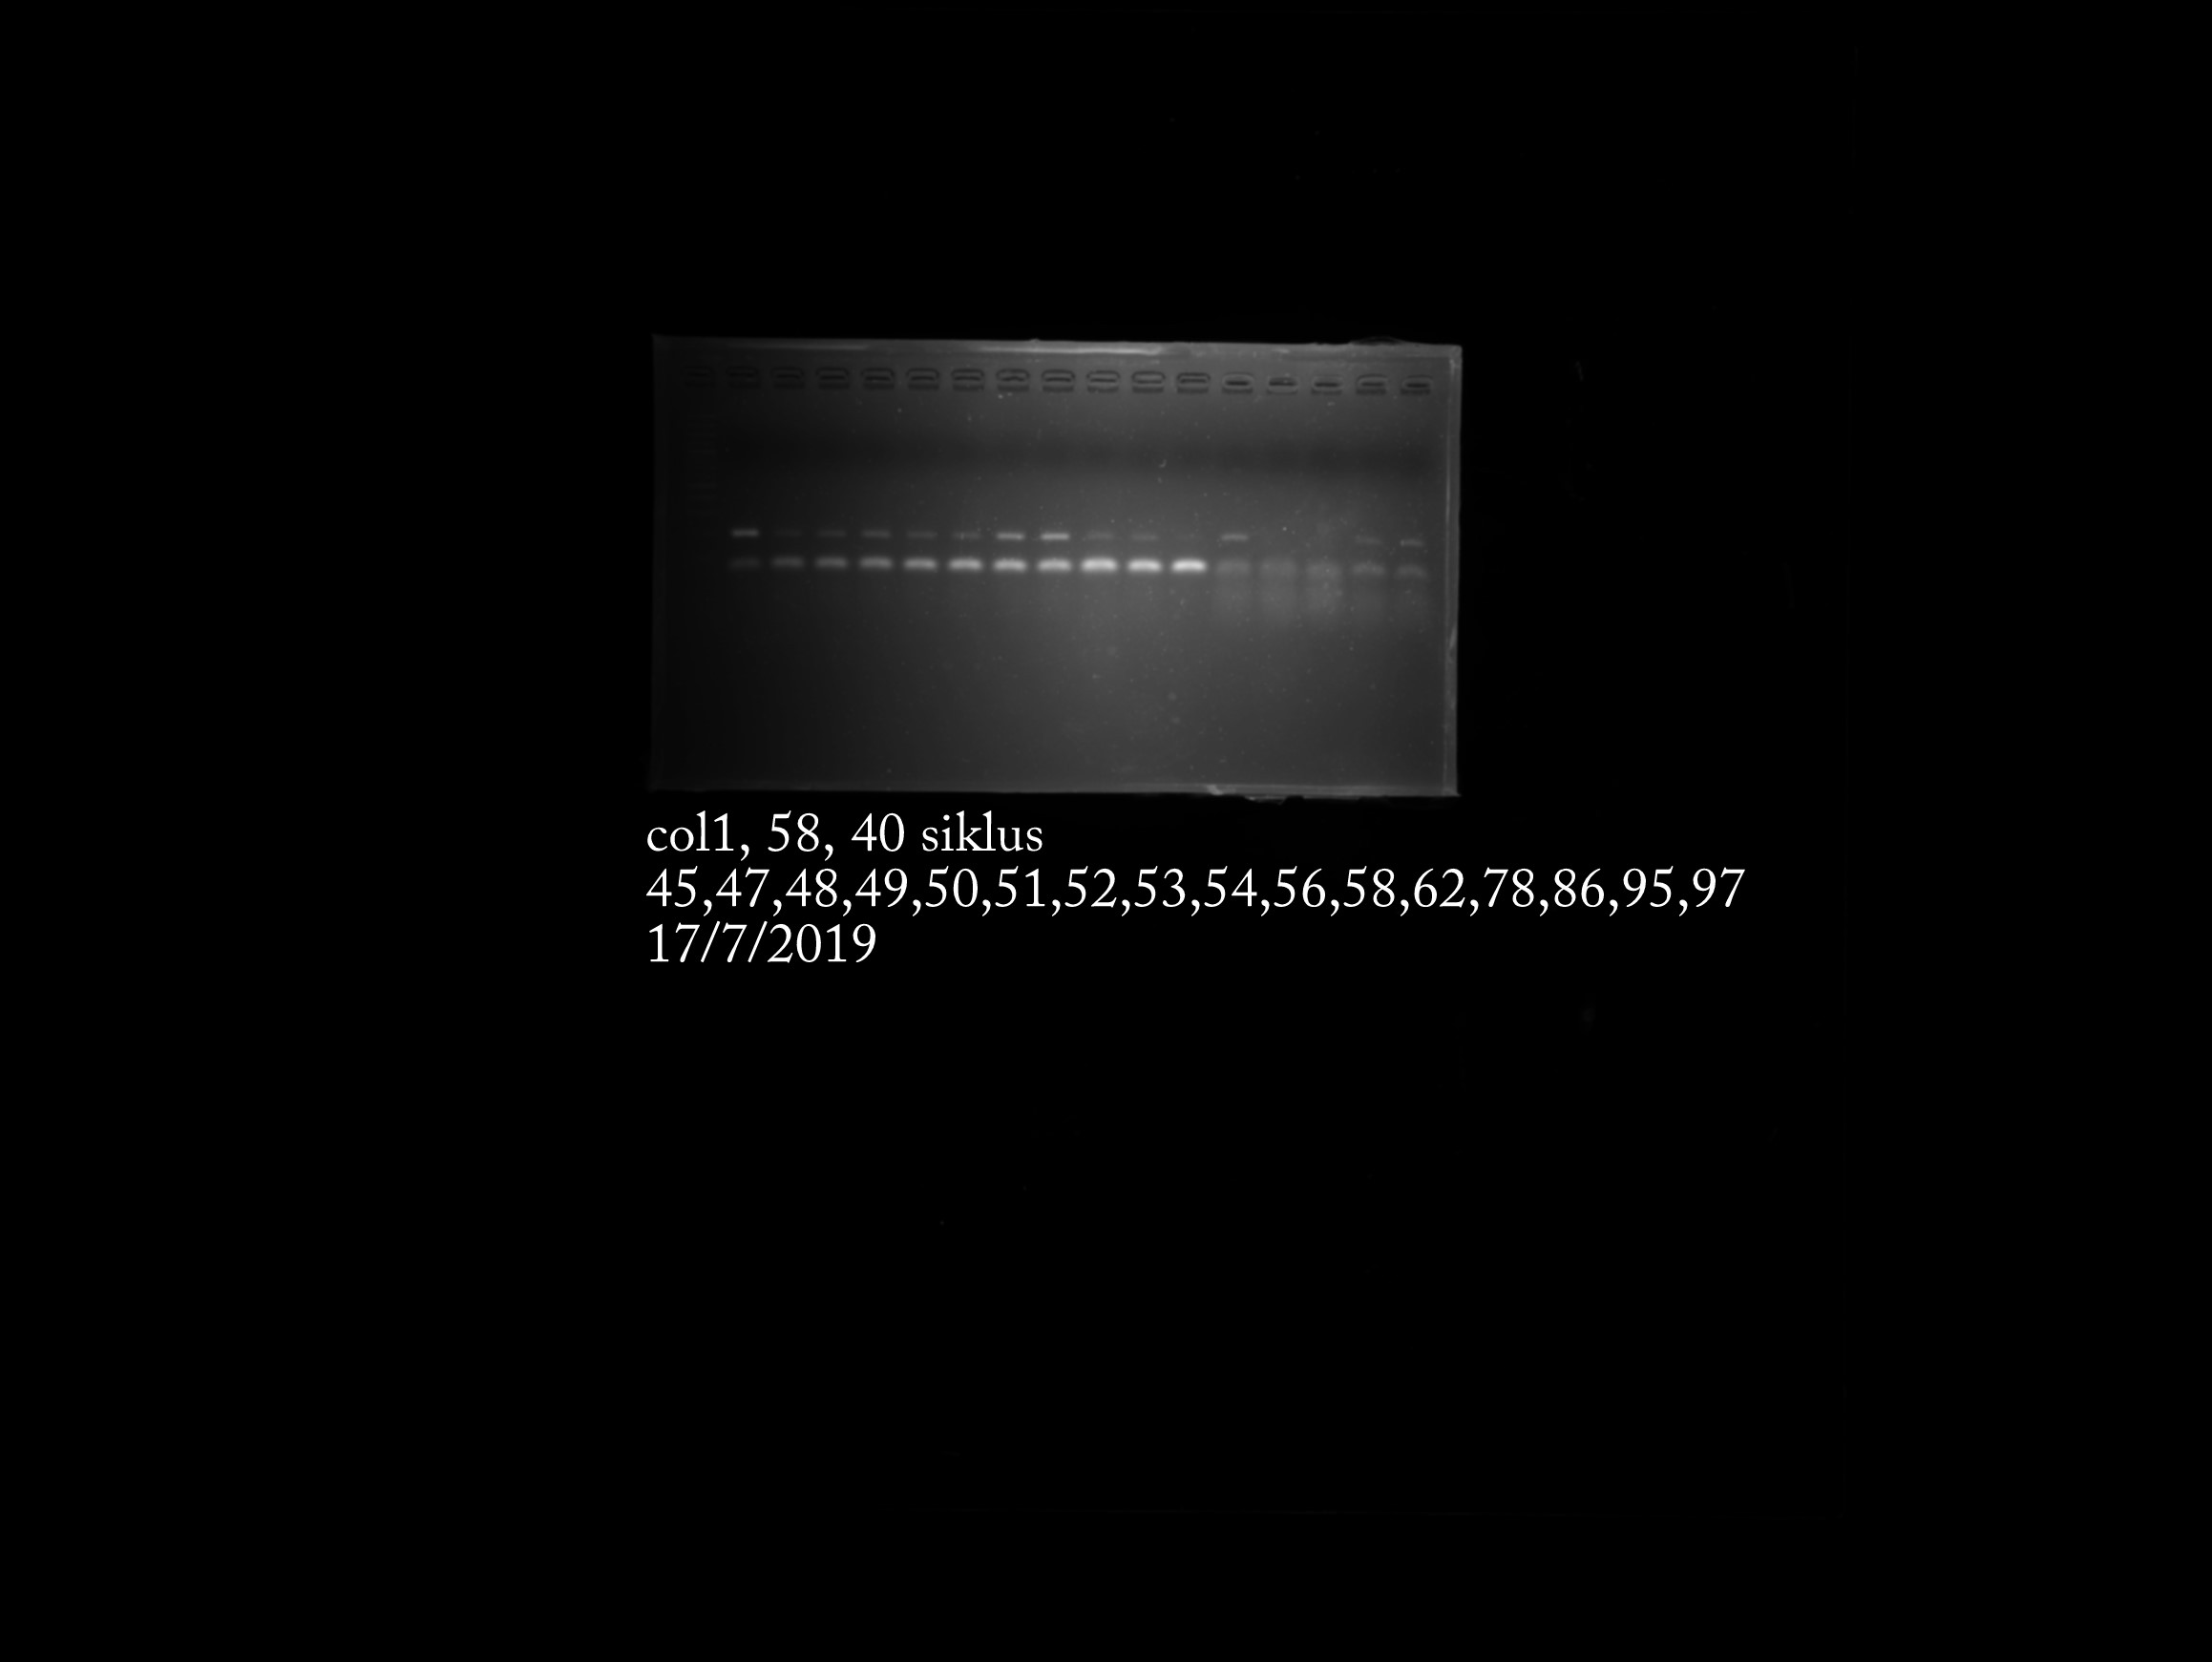


5


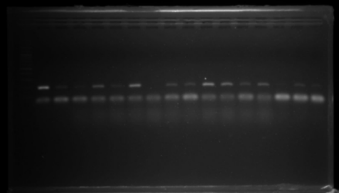


9

6


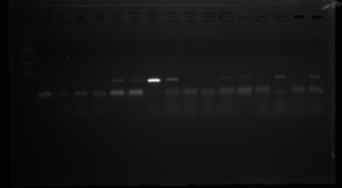


7


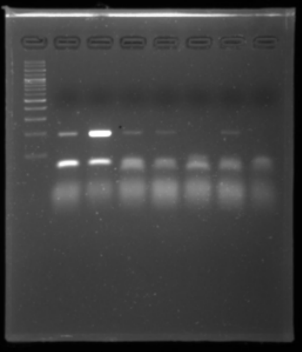


8

Figure 3. Full Length image of COL6A1 gels


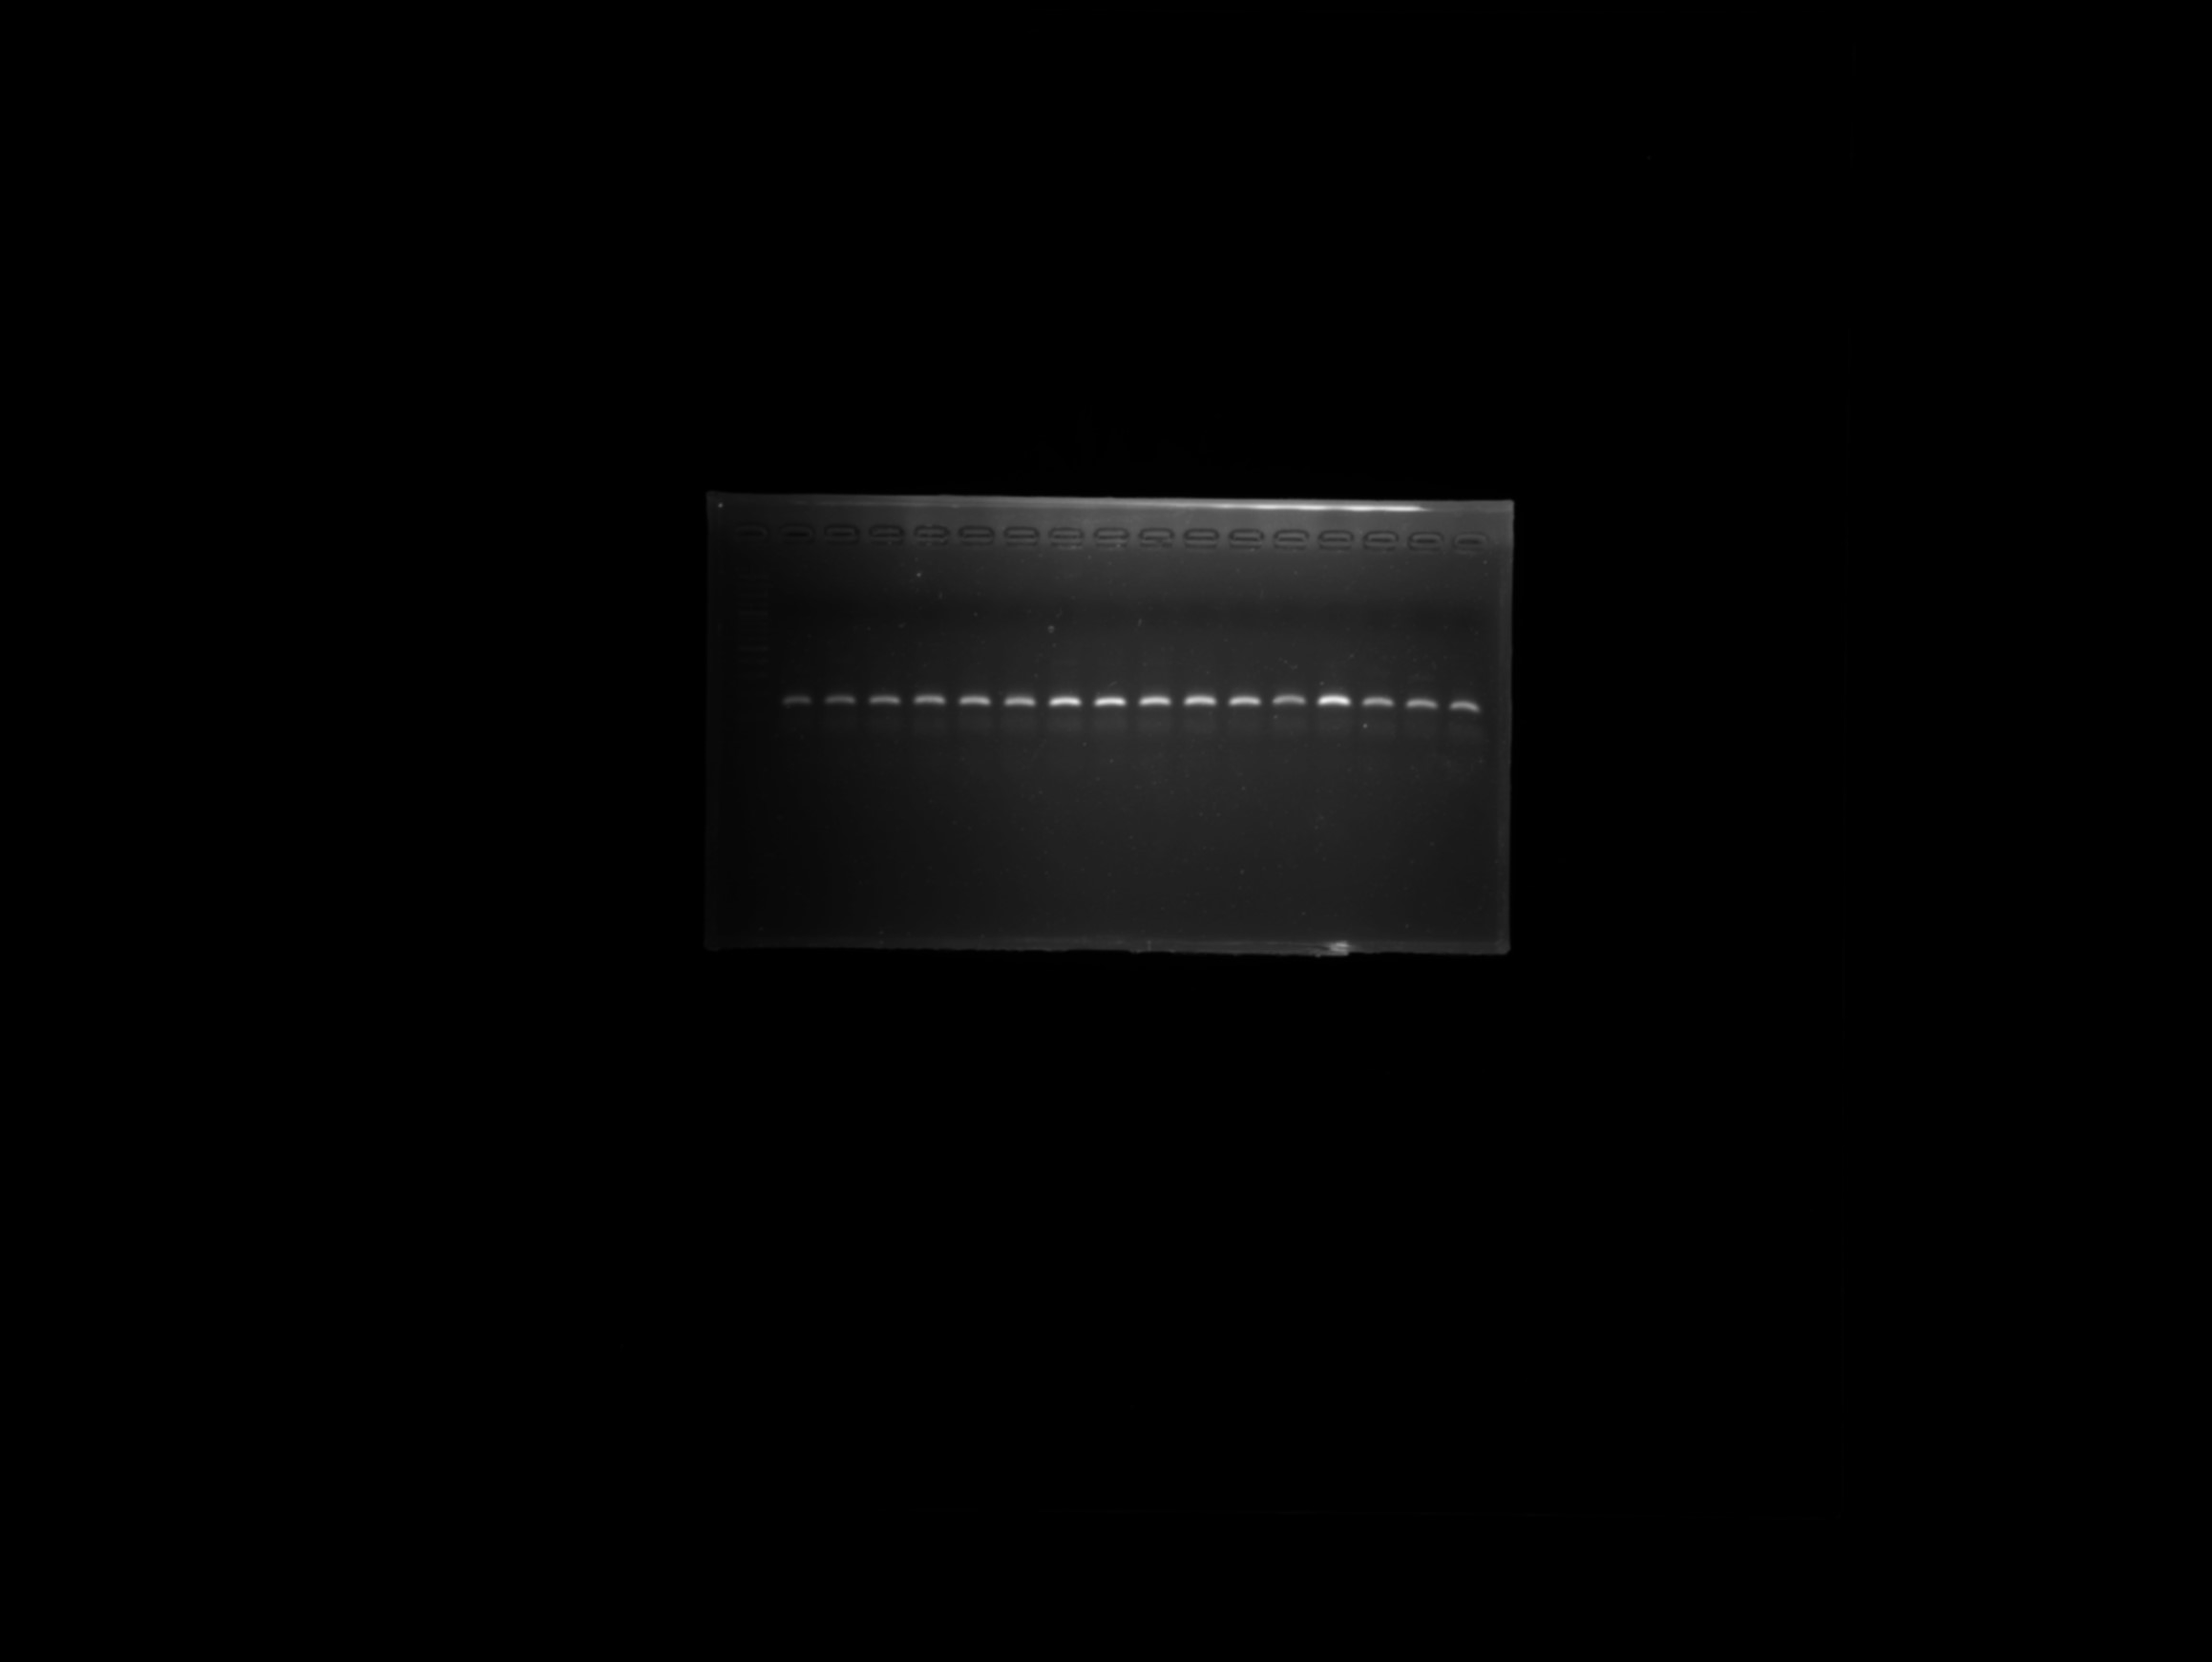


10


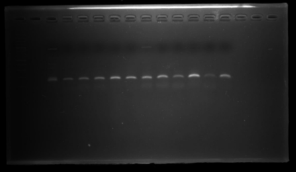


12

11

14

13


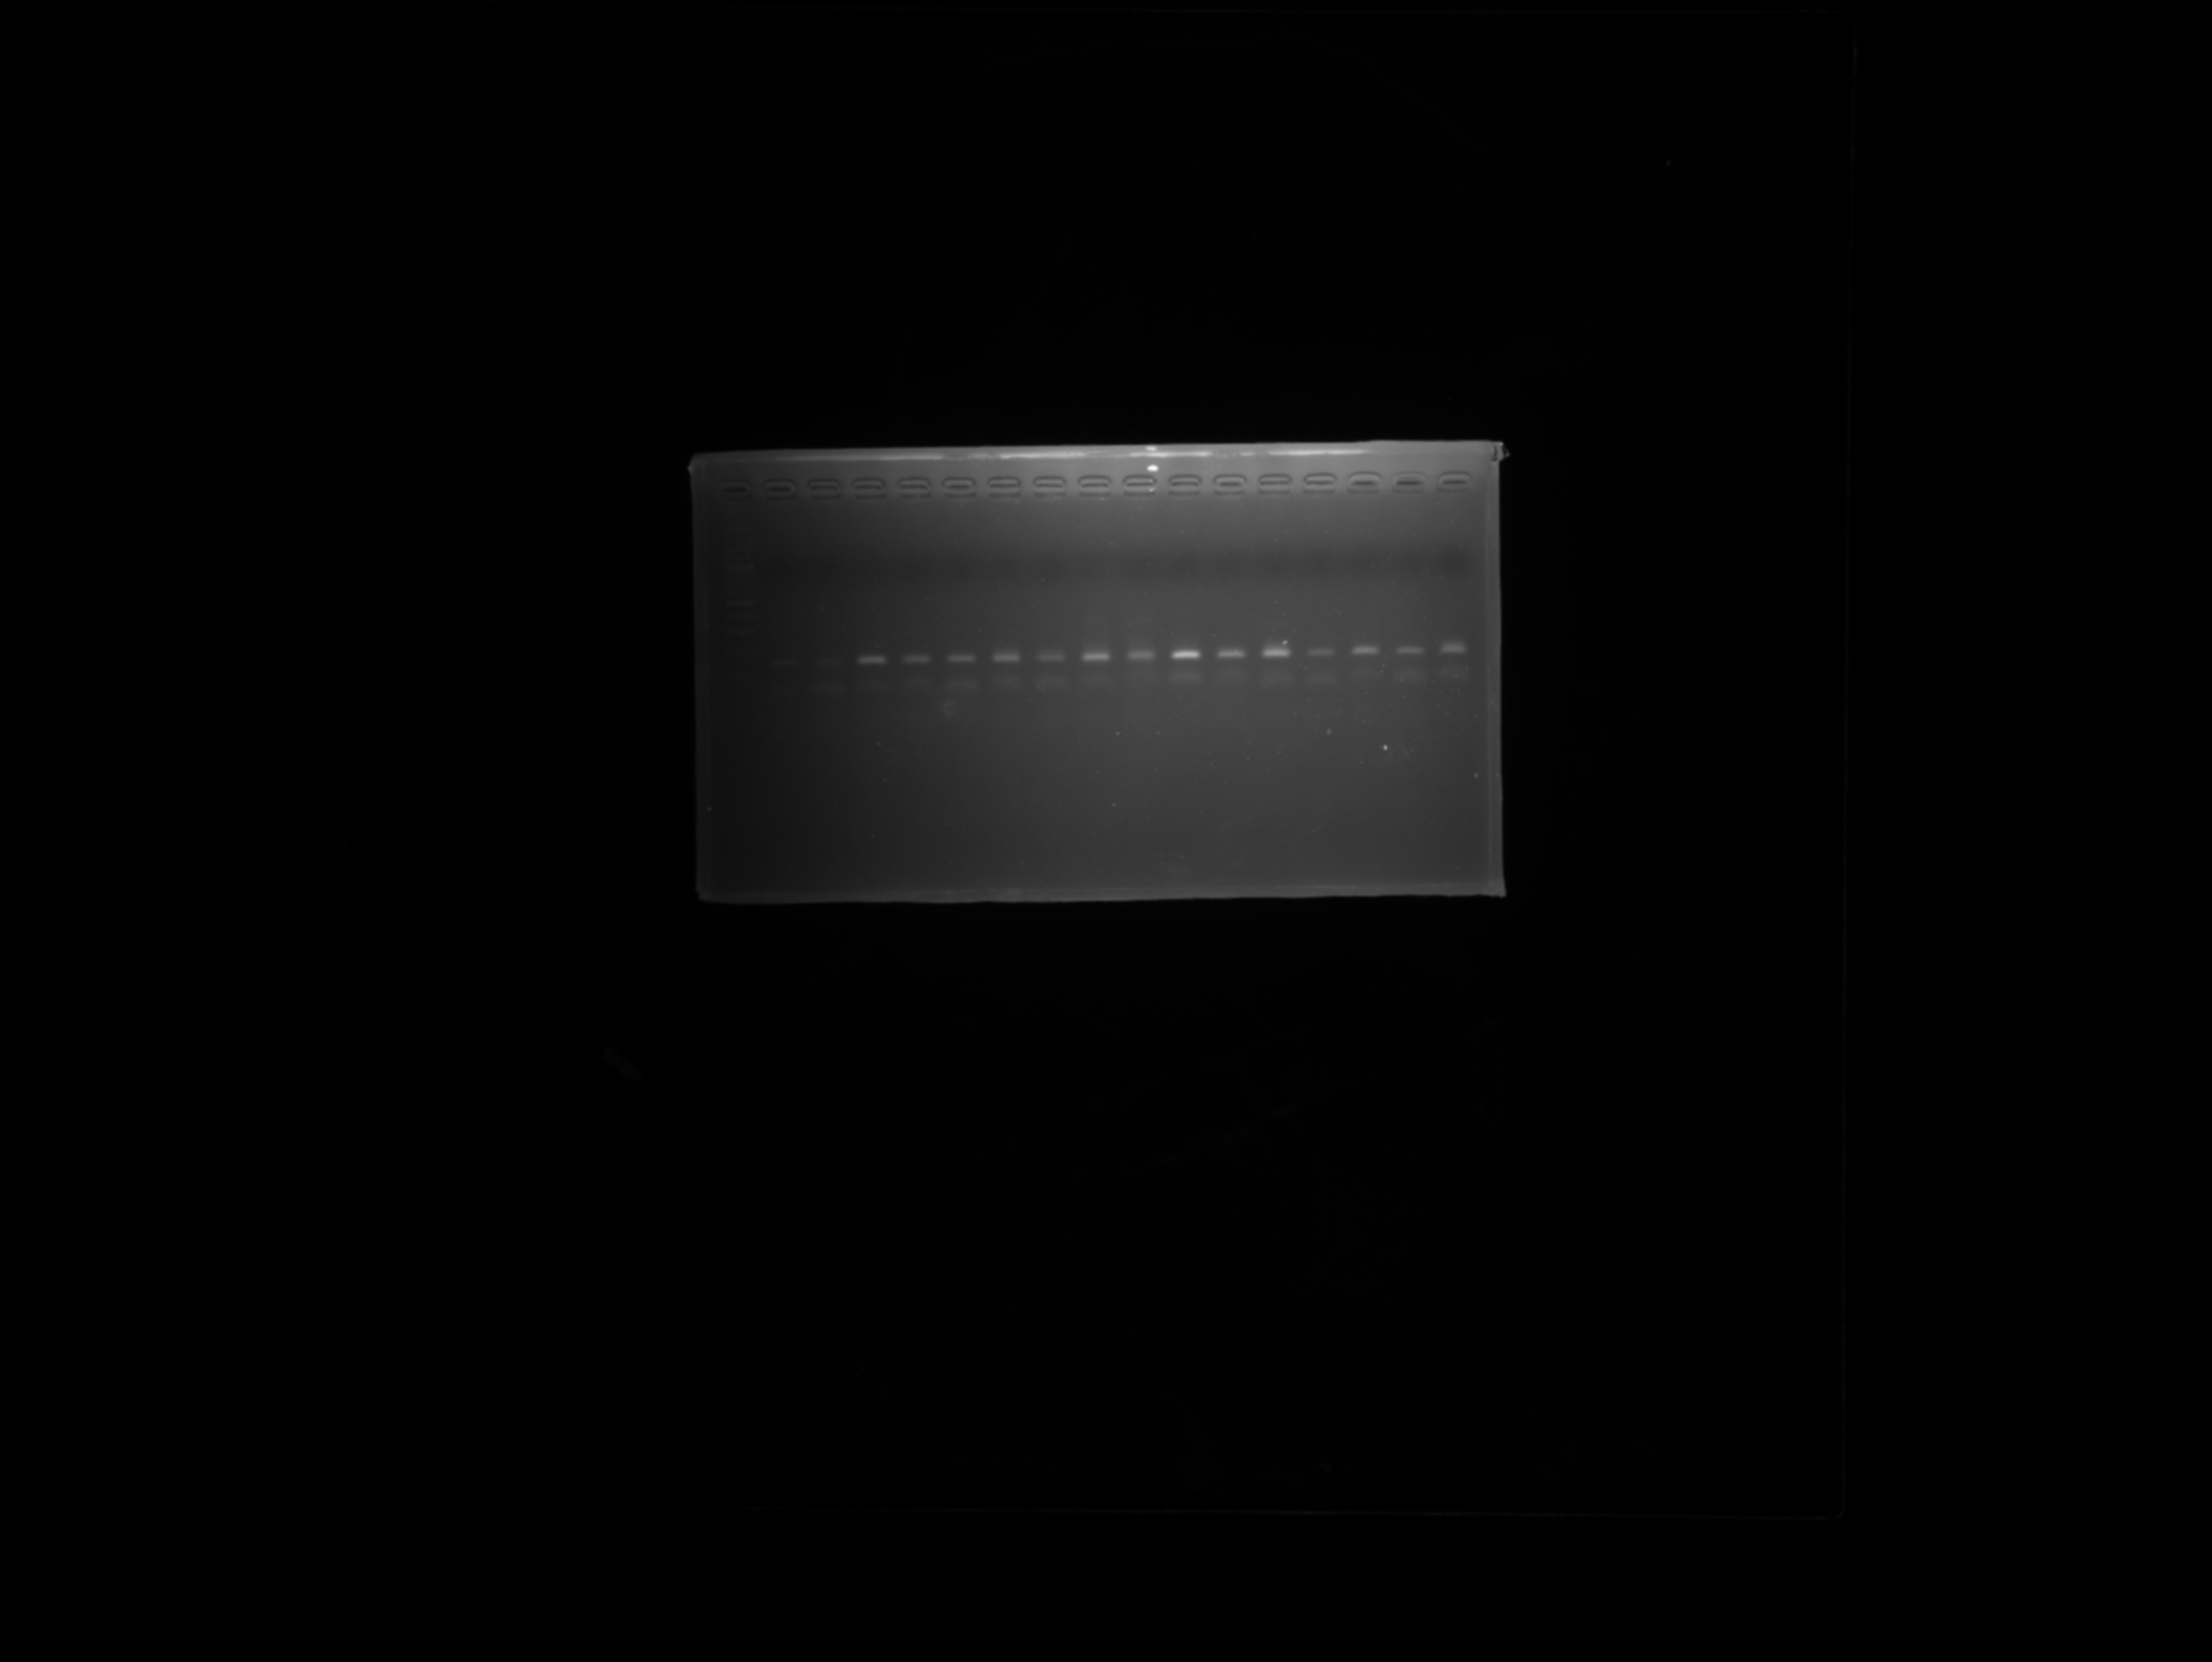


15
